# Supplementary material for: Guiding clinical management of patients with CNS lymphomas by minimal-invasive detection of ctDNA in cerebrospinal fluid
Source: Leukemia. 2025 Apr 9;39(5):1265–8. doi: 10.1038/s41375-025-02583-w (PMC12055572; doi:10.1038/s41375-025-02583-w)
Supplement: Supplementary file 2 — Supplementary Tables [file 41375_2025_2583_MOESM2_ESM.xlsx]

## Sheet: Table of contents
	Table of contents
	Weinschenk et al. Guiding treatment and clinical management of patients with CNS lymphomas by minimal-invasive detection of circulating tumor DNA in cerebrospinal fluid
	Supplementary Table 1	Primer, probes, and PCR conditions used for the design of the MYD88 L265P ddPCR assay.
	Supplementary Table 2	Determining limit of detection for the MYD88 L265P ddPCR assay.
	Supplementary Table 3	Determining limit of blank for the MYD88 L265P ddPCR assay in 21 plasma samples from healthy controls.
	Supplementary Table 4	Determining analytical specificity by analyzing 13 plasma samples from elderly healthy individuals.
	Supplementary Table 5	Plasma samples from CNSL patients with known MYD88 L265P status used for assessment of inter-assay reliability.
	Supplementary Table 6	Plasma samples from CNSL patients used for the assessment of intra-assay reliability.
	Supplementary Table 7	Overview and characteristics of CSF / plasma samples from patients included in the independent validation cohort.
	Supplementary Table 8	Overview and characteristics of CSF samples submitted for routine ctDNA testing by the MYD88 L265P ddPCR assay.
	Supplementary Table 9	Overview and characteristics of CSF samples and patients participating in the observational study.

## Sheet: Supplementary Table 1
Supplementary Table 1. Primer, probes, and PCR conditions used for the design of the MYD88 L265P ddPCR assay.
MYD88 L265P assay primer/probes
Primer
Gene	Target	Direction	Sequence
MYD88	L265P	forward	5'-TGG GCT TGT CCC ACC ATG-3'
		reverse	5'-TGG GGA ACT CTT TCT TCA TTG C-3'
Probes
Gene	Target
MYD88	L265P	Wildtype	5'- /5HEX/TGGGG+ATC+AGT+CGC+TTCT/3IABkFQ/ -3'
		chr3:38182641 (hg19) T>C	5'- /56-FAM/TGGGG+ATC+GGT+CGC+TTCT/3IABkFQ/ -3'
PCR conditions
Cycling step	Temperature (Celsius)	Time	Number of cycles
Enzyme activation	95	10 Min	1
Denaturation	95	30 Sec	40
Annealing/Extension	55	60 Sec
Enzyme deactivation	98	10 Min	1
Hold (optional)	12	Infinite	1
ddPCR, digital droplet PCR

## Sheet: Supplementary Table 2
Supplementary Table 2. Determining limit of detection for the MYD88 L265P ddPCR assay.
Dilution	Expected AF (%)	Measured Ø WT copies / well	Measured Ø MUT copies / well	Measured MUT:WT	Measured AF (%)	SD (MUT copies / well)	p value Unpaired t-test
NTC		0	0
WT		18455	0.0025
1:20	5	18510	724	1:26	3.9114	23.6643	<0.0001
1:40	2.5	18870	391.5	1:48	2.07472	28.9266	<0.0001
1:100	1	19020	191	1:100	1.00421	33.0303	<0.0001
1:200	0.5	18995	119.5	1:159	0.629113	32.9052	0.0008
1:400	0.25	19245	56	1:344	0.290985	11.0454	0.0001
1:800	0.125	18415	35.45	1:519	0.192506	11.6665	0.0019
1:1000	0.1	18500	16.15	1:1145	0.0872973	1.82962	<0.0001
1:2000	0.05	17980	9.1	1:1976	0.0506118	1.88414	<0.0001
1:10000	0.01	18532.5	1.9	1:9754	0.0102523	1.69115	0.068
AF, allele frequency
ddPCR, digital droplet PCR
WT, wildtype
MUT, mutated
SD, standard deviation
NTC, non template control

## Sheet: Supplementary Table 3
Supplementary Table 3. Determining limit of blank for the MYD88 L265P ddPCR assay in 21 plasma samples from healthy controls.
ID	Plasma volume (mL)	Volume elaute (µl)	mL plasma / well	Ø WT copies / well	Ø WT copies / mL plasma	Ø MUT copies / well	Ø MUT copies / mL plasma	Age
NTC				0		0
WT				18455		0
MIX				3360		422.5
HEAL_001	3.8	68.2	0.390029	1063	2725.44	0	0	26
HEAL_002	3.9	67.1	0.406855	436	1071.63	0	0	27
HEAL_003	3.9	67.7	0.40325	216.5	536.888	0	0	28
HEAL_004	3.8	61.5	0.43252	200.5	463.562	0	0	26
HEAL_005	3.9	68.4	0.399123	370	927.033	0	0	28
HEAL_006	4	62.8	0.44586	306.5	687.436	0	0	25
HEAL_007	4	60.9	0.45977	480.5	1045.09	0	0	28
HEAL_008	3.8	60.8	0.4375	200.5	458.286	0	0	27
HEAL_009	3.9	59.6	0.458054	629.5	1374.29	0	0	29
HEAL_010	4	67.8	0.412979	813	1968.62	0	0	32
HEAL_011	4	62.4	0.448718	1061	2364.51	0	0	23
HEAL_012	4	62.3	0.449438	1061	2360.72	0	0	20
HEAL_013	4	68.4	0.409357	453	1106.61	0	0	22
HEAL_014	4	43.8	0.639269	200	312.857	0	0	23
HEAL_015	4	67.8	0.412979	569	1377.79	0	0	23
HEAL_016	4	66.6	0.42042	1085.5	2581.94	0	0	26
HEAL_017	4	68.6	0.408163	515	1261.75	0	0	30
HEAL_018	4	64	0.4375	636.5	1454.86	0.3	0.685714	23
HEAL_019	4	69.6	0.402299	298	740.743	0	0	19
HEAL_020	4	69.8	0.401146	288	717.943	0	0	20
HEAL_021	4	65.7	0.42618	408	957.343	0	0	19
Mean						0.014	0.033
σ						0.064	0.146
LOB						0.2	0.5
ddPCR, digital droplet PCR
ID, identifier
NTC, non template control
WT, wildtype
mL, milliliters
µl, microliters
MUT, mutated
LOB, limit of blank

## Sheet: Supplementary Table 4
Supplementary Table 4. Determining analytical specificity by analyzing 13 plasma samples from elderly healthy individuals.
ID	Age	Sample type	Sample volume (mL)	MUT copies / mL	WT copies / mL	ddPCR result (pos/neg)	Allele frequency (%)
HEAL_022	52	Plasma	4	0	843.929	neg	0
HEAL_023	51	Plasma	4	0	1221.79	neg	0
HEAL_024	61	Plasma	4	0	1351.5	neg	0
HEAL_025	54	Plasma	4	0	872.5	neg	0
HEAL_026	56	Plasma	4	0	1323.13	neg	0
HEAL_027	22	Plasma	4	0	1660.87	neg	0
HEAL_028	25	Plasma	4	0	1721.42	neg	0
HEAL_029	62	Plasma	3.8	0	4477.19	neg	0
HEAL_030	58	Plasma	2.2	0	2726.39	neg	0
HEAL_031	55	Plasma	3.1	0	2091.49	neg	0
HEAL_032	83	Plasma	4	0	1707.23	neg	0
HEAL_033	63	Plasma	3.6	0	1798.95	neg	0
HEAL_034	61	Plasma	3.8	0	1758.68	neg	0
Median age:	56
ID, identifier
mL, milliliters
WT, wildtype
MUT, mutated
ddPCR, digital droplet PCR

## Sheet: Supplementary Table 5
Supplementary Table 5. Plasma samples from CNSL patients with known MYD88 L265P status used for assessment of inter-assay reliability.
ID	Diagnosis	ddPCR result Operator 1 (pos/neg)	Allele frequency (%), Operator 1	ddPCR result Operator 2 (pos/neg)	Allele frequency (%), Operator 2
P01	CNSL	pos	0.67	pos	0.74
P02	CNSL	neg	0	neg	0
P03	CNSL	pos	0.22	pos	0.13
P04	CNSL	pos	2.27	pos	2.31
P05	CNSL	pos	0.21	pos	0.1
P06	CNSL	pos	1.75	pos	2.17
P07	CNSL	pos	1.74	pos	2.11
P08	CNSL	pos	1.78	pos	2.1
P09	CNSL	neg	0	neg	0
P10	CNSL	neg	0	neg	0
P11	CNSL	neg	0	neg	0
P12	CNSL	neg	0	neg	0
P13	CNSL	neg	0	neg	0
CNSL, central nervous system lymphoms
ID, identifier
ddPCR, digital droplet PCR
pos, positive
neg, negative

## Sheet: Supplementary Table 6
Supplementary Table 6. Plasma samples from CNSL patients used for the assessment of intra-assay reliability.
ID	Diagnosis	Total copies well 1	Total copies well 2	Total copies well 3	Total copies well 4	Variation coefficient (%)
P14	CNSL	798.4	808.6	842.6	802.4	2.48
P15	CNSL	1282	1393.2	1350	1392	3.86
P16	CNSL	708.4	675.2	648	656	4
P17	CNSL	834.6	794	819	793.4	2.49
P18	CNSL	860	891.2	877.2	951.2	4.43
P19	CNSL	2046	2158	2028	2060	2.81
P20	CNSL	2548	2552	2680	2658	2.66
P21	CNSL	3004	2914	3010	2898	1.99
CNSL, central nervous system lymphoms
ID, identifier

## Sheet: Supplementary Table 7
Supplementary Table 7. Overview and characterisitcs of CSF / plasma samples from patients included in the independent validation cohort.
Patient ID	Diagnosis	Sex (M/F)	Sample type	Sample time point	Sample volume (mL)	ddPCR result (pos/neg)	ddPCR allele frequency (%)	NGS results available (yes/no)	NGS result (pos/neg)	NGS allele frequency (%)	Matched tumor MYD88 L265P status (pos/neg/NA)	Conventional CSF CP/FC analysis (pos/neg/NA)
CNSL_001	PCNSL	F	Plasma	Diagnosis	9	neg	0	yes	neg	0	pos	NA
CNSL_002	PCNSL	M	Plasma	1st relapse	9	neg	0	yes	pos	0.155	NA	NA
CNSL_003	iSCNSL	M	CSF	Diagnosis	1.1	pos	2.492	yes	pos	1.931	pos	neg
CNSL_003	iSCNSL	M	Plasma	Diagnosis	9	neg	0	yes	pos	0.103	pos	NA
CNSL_003	iSCNSL	M	Plasma	1st relapse	9.5	pos	0.074	yes	neg	0	NA	NA
CNSL_004	iSCNSL	M	Plasma	1st relapse	6.54	neg	0	yes	neg	0	NA	NA
CNSL_005	PCNSL	M	CSF	Diagnosis	2	pos	4.156	no	NA	NA	pos	pos
CNSL_005	PCNSL	M	Plasma	Diagnosis	2.7	neg	0	yes	pos	0.113	pos	NA
CNSL_005	PCNSL	M	Plasma	1st relapse	7.2	pos	0.229774	yes	pos	0.096	NA	NA
CNSL_005	PCNSL	M	Plasma	2nd relapse	3.6	neg	0	yes	neg	0	NA	NA
CNSL_005	PCNSL	M	Plasma	3rd relapse	8.8	neg	0	yes	neg	0	NA	NA
CNSL_006	iSCNSL	F	Plasma	3rd relapse	8.2	neg	0	no	NA	NA	NA	NA
CNSL_007	PCNSL	M	Plasma	2nd relapse	8.5	neg	0	yes	neg	0	NA	NA
CNSL_007	PCNSL	M	Plasma	3rd relapse	8.4	neg	0	yes	neg	0	NA	NA
CNSL_008	PCNSL	F	Plasma	Diagnosis	4	neg	0	yes	neg	0	pos	NA
CNSL_008	PCNSL	F	Plasma	1st relapse	8.7	neg	0	yes	neg	0	NA	NA
CNSL_009	PCNSL	F	Plasma	3rd relapse	9.7	neg	0	yes	neg	0	NA	NA
CNSL_010	PCNSL	M	Plasma	Diagnosis	9.1	neg	0	no	NA	NA	neg	NA
CNSL_011	PCNSL	F	Plasma	Diagnosis	6.1	pos	0.0774593	yes	pos	0.154	pos	NA
CNSL_012	PCNSL	M	Plasma	Diagnosis	6.7	neg	0	yes	neg	0	pos	NA
CNSL_013	PCNSL	F	Plasma	1st relapse	9.8	pos	0.237127	yes	pos	0.241	pos	NA
CNSL_014	PCNSL	F	Plasma	Diagnosis	3.1	neg	0	yes	neg	0	pos	NA
CNSL_015	PCNSL	M	CSF	Diagnosis	1.5	pos	1.27238	yes	pos	3.198	pos	pos
CNSL_015	PCNSL	M	Plasma	Diagnosis	3.1	pos	0.159853	yes	pos	0.293	pos	NA
CNSL_016	iSCNSL	M	Plasma	1st relapse	8.5	neg	0	no	NA	NA	pos	NA
CNSL_017	PCNSL	F	Plasma	Diagnosis	8.3	neg	0	yes	neg	0	pos	NA
CNSL_018	PCNSL	F	Plasma	Diagnosis	9.2	neg	0	no	NA	NA	pos	NA
CNSL_018	PCNSL	F	Plasma	1st relapse	8.5	neg	0	no	NA	NA	NA	NA
CNSL_019	PCNSL	M	Plasma	Diagnosis	8.8	neg	0	no	NA	NA	neg	NA
CNSL_019	PCNSL	M	Plasma	1st relapse	6.3	neg	0	no	NA	NA	NA	NA
CNSL_020	PCNSL	F	CSF	Diagnosis	3	neg	0	no	NA	NA	neg	neg
CNSL_020	PCNSL	F	Plasma	Diagnosis	8.4	neg	0	no	NA	NA	neg	NA
CNSL_021	PCNSL	M	Plasma	1st relapse	7.6	neg	0	yes	neg	0	NA	NA
CNSL_021	PCNSL	M	Plasma	2nd relapse	10.5	neg	0	yes	neg	0	NA	NA
CNSL_021	PCNSL	M	Plasma	3rd relapse	8.4	pos	0.0641098	yes	pos	0.371	NA	NA
CNSL_022	PCNSL	F	CSF	2nd relapse	3	neg	0	yes	neg	0	pos	neg
CNSL_022	PCNSL	F	Plasma	Diagnosis	8.8	neg	0	yes	neg	0	pos	NA
CNSL_022	PCNSL	F	Plasma	1st relapse	8.4	neg	0	yes	neg	0	NA	NA
CNSL_022	PCNSL	F	Plasma	2nd relapse	7.8	neg	0	yes	neg	0	NA	NA
CNSL_022	PCNSL	F	Plasma	3rd relapse	9.9	neg	0	yes	neg	0	NA	NA
CNSL_023	PCNSL	F	Plasma	Diagnosis	4	neg	0	no	NA	NA	NA	NA
CNSL_024	PCNSL	F	Plasma	Diagnosis	9.2	pos	41.2907	yes	pos	42.735	pos	NA
CNSL_025	PCNSL	M	Plasma	Diagnosis	10	neg	0	yes	neg	0	pos	NA
CNSL_026	PCNSL	M	Plasma	Diagnosis	9.4	neg	0	no	NA	NA	neg	NA
CNSL_026	PCNSL	M	Plasma	1st relapse	10.4	neg	0	no	NA	NA	NA	NA
CNSL_027	PCNSL	F	Plasma	Diagnosis	5.6	pos	0.0520462	yes	pos	0.057	pos	NA
CNSL_028	PCNSL	M	Plasma	Diagnosis	7	neg	0	yes	neg	0	pos	NA
CNSL_029	PCNSL	M	Plasma	Diagnosis	6.4	neg	0	yes	neg	0	pos	NA
CNSL_029	PCNSL	M	Plasma	1st relapse	7.6	neg	0	yes	pos	0.023	NA	NA
CNSL_029	PCNSL	M	Plasma	2nd relapse	9.9	neg	0	yes	neg	0	NA	NA
CNSL_029	PCNSL	M	Plasma	3rd relapse	11.8	neg	0	yes	neg	0	NA	NA
CNSL_030	PCNSL	F	CSF	2nd relapse	1.9	pos	29.9244	yes	pos	34.259	pos	neg
CNSL_030	PCNSL	F	Plasma	Diagnosis	10.6	pos	16.8093	yes	pos	19.772	NA	NA
CNSL_030	PCNSL	F	Plasma	2nd relapse	9.8	neg	0	yes	pos	0.036	NA	NA
CNSL_031	PCNSL	M	Plasma	Diagnosis	6.1	neg	0	yes	neg	0	pos	NA
CNSL_032	PCNSL	M	Plasma	Diagnosis	11.3	pos	0.0565052	yes	pos	0.166	pos	NA
CNSL_033	PCNSL	F	Plasma	Diagnosis	11.6	neg	0	yes	neg	0	pos	NA
CNSL_034	PCNSL	M	Plasma	Diagnosis	11.8	neg	0	yes	neg	0	pos	NA
CNSL_035	PCNSL	M	Plasma	Diagnosis	5.9	neg	0	yes	neg	0	pos	NA
CNSL_036	iSCNSL	M	CSF	1st relapse	1.8	neg	0	yes	neg	0	NA	neg
CNSL_036	iSCNSL	M	Plasma	Diagnosis	8.2	neg	0	yes	neg	0	pos	NA
CNSL_036	iSCNSL	M	Plasma	1st relapse	9.1	neg	0	yes	pos	0.189	NA	NA
CNSL_037	iSCNSL	M	Plasma	Diagnosis	8.8	pos	0.508622	yes	pos	0.843	pos	NA
CNSL_038	PCNSL	F	Plasma	1st relapse	7	neg	0	yes	neg	0	NA	NA
CNSL_039	PCNSL	F	Plasma	Diagnosis	9	pos	3.07971	yes	pos	4.279	pos	NA
CNSL_039	PCNSL	F	Plasma	1st relapse	9.9	neg	0	yes	neg	0	NA	NA
CNSL_040	iSCNSL	M	Plasma	Diagnosis	9.1	pos	0.330317	yes	pos	0.699	pos	NA
CNSL_040	iSCNSL	M	Plasma	1st relapse	11	pos	0.479303	yes	pos	0.506	NA	NA
CNSL_040	iSCNSL	M	Plasma	3rd relapse	8.4	neg	0	yes	neg	0	NA	NA
CNSL_041	PCNSL	F	Plasma	Diagnosis	3.4	neg	0	no	NA	NA	pos	NA
CNSL_042	iSCNSL	M	Plasma	Diagnosis	8.8	neg	0	yes	neg	0	pos	NA
CNSL_043	PCNSL	M	CSF	Diagnosis	2.7	pos	1.0521	no	NA	NA	NA	neg
CNSL_044	PCNSL	F	CSF	Diagnosis	4.1	neg	0	no	NA	NA	NA	neg
CNSL_045	PCNSL	M	CSF	Diagnosis	3.2	pos	0.607713	no	NA	NA	NA	neg
CNSL_046	PCNSL	F	CSF	Diagnosis	1.8	neg	0	no	NA	NA	NA	neg
CNSL_047	PCNSL	F	CSF	Diagnosis	3.2	neg	0	no	NA	NA	NA	neg
CNSL_048	PCNSL	M	Plasma	1st relapse	9.2	neg	0	yes	neg	0	pos	NA
CNSL_049	PCNSL	M	CSF	Diagnosis	3	pos	0.178569	no	NA	NA	NA	neg
CNSL_050	PCNSL	M	CSF	Diagnosis	3.1	pos	0.980392	no	NA	NA	NA	neg
CNSL_051	PCNSL	M	CSF	Diagnosis	4.1	neg	0	no	NA	NA	NA	pos
CNSL_052	PCNSL	M	CSF	Diagnosis	1.9	pos	0.0727626	no	NA	NA	pos	neg
CNSL_053	PCNSL	F	CSF	Diagnosis	2.2	pos	7.34675	no	NA	NA	NA	pos
CNSL_054	PCNSL	M	CSF	Diagnosis	5.1	pos	11.033	no	NA	NA	NA	neg
CNSL_055	PCNSL	F	CSF	Diagnosis	2.7	pos	15.346	no	NA	NA	NA	neg
CNSL_056	PCNSL	M	CSF	Diagnosis	2.3	pos	60.8579	no	NA	NA	NA	neg
CNSL_057	PCNSL	F	CSF	Diagnosis	3.2	pos	0.202037	no	NA	NA	NA	neg
CNSL_058	PCNSL	M	CSF	Diagnosis	2.7	neg	0	no	NA	NA	NA	neg
CNSL_059	PCNSL	M	CSF	Diagnosis	3.6	pos	0.81186	no	NA	NA	NA	neg
CNSL_060	PCNSL	F	CSF	Diagnosis	4	pos	3.72556	no	NA	NA	NA	neg
CNSL_061	PCNSL	M	CSF	Diagnosis	3.6	pos	0.0959577	no	NA	NA	NA	neg
CNSL_062	PCNSL	F	Plasma	Diagnosis	7.4	pos	0.093692	yes	pos	0.146	pos	NA
CNSL_063	PCNSL	F	CSF	Diagnosis	0.9	neg	0	no	NA	NA	NA	pos
CNSL_064	PCNSL	M	CSF	Diagnosis	2.1	pos	25.3632	no	NA	NA	NA	neg
CNSL_065	PCNSL	F	CSF	Diagnosis	1.2	pos	5.5334	yes	pos	11.494	NA	pos
CNSL_066	PCNSL	M	CSF	Diagnosis	1.7	neg	0	no	NA	NA	NA	neg
CNSL_067	PCNSL	M	CSF	Diagnosis	2.1	neg	0	no	NA	NA	neg	neg
CNSL_068	PCNSL	M	CSF	Diagnosis	1.1	neg	0	no	NA	NA	neg	neg
CNSL_068	PCNSL	M	Plasma	Diagnosis	7.9	pos	0.404936	no	NA	NA	NA	NA
CNSL_069	PCNSL	F	Plasma	Diagnosis	6.5	neg	0	no	NA	NA	neg	NA
CNSL_070	PCNSL	F	CSF	2nd relapse	2.5	pos	71.8075	yes	pos	76.224	NA	neg
CNSL_070	PCNSL	F	CSF	3rd relapse	0.8	pos	82.9787	yes	pos	77.338	NA	neg
CNSL_070	PCNSL	F	Plasma	Diagnosis	9.8	pos	4.54824	yes	pos	8.573	pos	NA
CNSL_070	PCNSL	F	Plasma	1st relapse	9.9	pos	1.04167	yes	pos	1.235	NA	NA
CNSL_071	PCNSL	F	Plasma	Diagnosis	8.3	neg	0	yes	neg	0	pos	NA
CNSL_072	iSCNSL	M	Plasma	Diagnosis	11.3	neg	0	yes	neg	0	pos	NA
CNSL_073	PCNSL	M	Plasma	Diagnosis	10.1	neg	0	yes	neg	0	pos	NA
CNSL_074	PCNSL	F	CSF	Diagnosis	2.5	pos	3.92006	yes	pos	1.195	pos	neg
CNSL_074	PCNSL	F	Plasma	Diagnosis	8.5	pos	0.131298	yes	pos	0.097	pos	NA
CNSL_075	PCNSL	F	Plasma	Diagnosis	10.3	pos	0.0625361	yes	pos	0.034	pos	NA
CNSL_076	PCNSL	M	CSF	Diagnosis	1.5	pos	0.341863	yes	pos	0.384	pos	neg
CNSL_076	PCNSL	M	Plasma	Diagnosis	7.7	pos	0.0924214	yes	pos	0.092	pos	NA
CNSL_077	PCNSL	M	CSF	Diagnosis	9.9	neg	0	yes	neg	0	pos	neg
CNSL_078	PCNSL	M	CSF	Diagnosis	2.7	neg	0	no	NA	NA	neg	neg
CNSL_079	PCNSL	F	CSF	Diagnosis	1.5	pos	32.6547	yes	pos	31.897	pos	neg
CNSL_080	PCNSL	F	CSF	Diagnosis	4.9	pos	0.10241	yes	neg	0	pos	neg
CNSL_081	iSCNSL	F	CSF	Diagnosis	5	neg	0	no	NA	NA	NA	neg
CNSL_082	PCNSL	F	CSF	Diagnosis	6.3	pos	6.8939	no	NA	NA	NA	neg
CNSL_083	PCNSL	F	CSF	Diagnosis	1	pos	47.5138	no	NA	NA	NA	pos
CNSL_084	PCNSL	M	CSF	Diagnosis	1.4	pos	31.299	no	NA	NA	NA	neg
CNSL_085	PCNSL	M	CSF	Diagnosis	1.9	pos	31.9877	no	NA	NA	NA	pos
CNSL_086	PCNSL	F	CSF	Diagnosis	4.3	pos	22.7865	no	NA	NA	NA	pos
CNSL_087	PCNSL	M	CSF	Diagnosis	3.1	pos	29.5102	no	NA	NA	NA	pos
Non-CNSL_001	GBM	M	Plasma	Diagnosis	9.4	neg	0	no	NA	NA	NA	NA
Non-CNSL_002	GBM	M	Plasma	Diagnosis	3.6	neg	0	no	NA	NA	NA	NA
Non-CNSL_003	GBM	M	Plasma	Diagnosis	6.1	neg	0	no	NA	NA	neg	NA
Non-CNSL_004	GBM	M	Plasma	Diagnosis	6.8	neg	0	no	NA	NA	NA	NA
Non-CNSL_005	Astrocytoma	M	Plasma	Diagnosis	7.2	neg	0	no	NA	NA	NA	NA
Non-CNSL_006	Atypical plexus papilloma	M	CSF	Diagnosis	6.4	neg	0	no	NA	NA	NA	NA
Non-CNSL_006	Atypical plexus papilloma	M	Plasma	Diagnosis	7	neg	0	no	NA	NA	NA	NA
Non-CNSL_007	GBM	F	Plasma	Diagnosis	8.9	neg	0	no	NA	NA	NA	NA
Non-CNSL_008	GBM	M	Plasma	Diagnosis	9.4	neg	0	no	NA	NA	NA	NA
Non-CNSL_009	GBM	M	Plasma	Diagnosis	9	neg	0	no	NA	NA	NA	NA
Non-CNSL_010	GBM	F	Plasma	Diagnosis	8.8	neg	0	no	NA	NA	NA	NA
Non-CNSL_011	GBM	F	Plasma	Diagnosis	8.2	neg	0	no	NA	NA	NA	NA
Non-CNSL_012	NSCLC metastasis	F	CSF	Diagnosis	1.4	neg	0	no	NA	NA	NA	NA
Non-CNSL_013	NSCLC metastasis	M	CSF	Diagnosis	0.9	neg	0	no	NA	NA	NA	NA
Non-CNSL_014	Astrocytoma	M	CSF	Diagnosis	4.3	neg	0	no	NA	NA	NA	NA
Non-CNSL_014	Astrocytoma	M	Plasma	Diagnosis	4	neg	0	no	NA	NA	NA	NA
Non-CNSL_015	Astrocytoma	F	CSF	Diagnosis	0.7	neg	0	no	NA	NA	NA	NA
Non-CNSL_015	Astrocytoma	F	Plasma	Diagnosis	8.1	neg	0	no	NA	NA	NA	NA
Non-CNSL_016	Pleomorphic Xanthoastrocytoma	F	CSF	Diagnosis	4	neg	0	no	NA	NA	NA	NA
Non-CNSL_016	Pleomorphic Xanthoastrocytoma	F	Plasma	Diagnosis	9.2	neg	0	no	NA	NA	NA	NA
Non-CNSL_017	GBM	F	CSF	Diagnosis	0.2	neg	0	no	NA	NA	NA	NA
Non-CNSL_017	GBM	F	Plasma	Diagnosis	9.2	neg	0	no	NA	NA	NA	NA
Non-CNSL_018	Melanoma metastasis	M	CSF	Diagnosis	1.5	neg	0	no	NA	NA	NA	NA
Non-CNSL_019	Melanoma metastasis	M	CSF	Diagnosis	1.4	neg	0	no	NA	NA	NA	NA
Non-CNSL_020	Neurotuberculosis	F	CSF	Diagnosis	0.9	neg	0	no	NA	NA	NA	NA
Non-CNSL_021	Optic neuritis	M	CSF	Diagnosis	1.2	neg	0	no	NA	NA	NA	NA
Non-CNSL_022	Multiple sclerosis	F	CSF	Diagnosis	0.8	neg	0	no	NA	NA	NA	NA
Non-CNSL_023	Autoimmune Pachy- / Leptomeningitis	F	CSF	Diagnosis	1.2	neg	0	no	NA	NA	NA	NA
Non-CNSL_024	Multiple sclerosis	M	CSF	Diagnosis	1.1	neg	0	no	NA	NA	NA	NA
Non-CNSL_025	Neurosarcoidosis	F	CSF	Diagnosis	0.8	neg	0	no	NA	NA	NA	NA
Non-CNSL_026	Neuromyelitis	F	CSF	Diagnosis	1.5	neg	0	no	NA	NA	NA	NA
Non-CNSL_027	Multiple sclerosis	M	CSF	Diagnosis	1.2	neg	0	no	NA	NA	NA	NA
Non-CNSL_028	Acute disseminated encephalomyelitis (ADEM)	F	CSF	Diagnosis	0.3	neg	0	no	NA	NA	NA	NA
Non-CNSL_029	Multiple sclerosis	F	CSF	Diagnosis	0.6	neg	0	no	NA	NA	NA	NA
Non-CNSL_030	Bacterial meningitis	F	CSF	Diagnosis	1.3	neg	0	no	NA	NA	NA	NA
Non-CNSL_031	Breast cancer metastasis (meningeal carcinomatosis)	F	CSF	Diagnosis	2.8	neg	0	no	NA	NA	NA	NA
Non-CNSL_032	Breast cancer metastasis (meningeal carcinomatosis)	F	CSF	Diagnosis	1.5	neg	0	no	NA	NA	NA	NA
Non-CNSL_033	Cancer of unknown primary metastasis (meningeal carcinomatosis)	F	CSF	Diagnosis	3	neg	0	no	NA	NA	NA	NA
Non-CNSL_034	SCLC metastasis (meningeal carcinomatosis)	M	CSF	Diagnosis	1.5	neg	0	no	NA	NA	NA	NA
Non-CNSL_035	Breast cancer metastasis (meningeal carcinomatosis)	F	CSF	Diagnosis	0.6	neg	0	no	NA	NA	NA	NA
Non-CNSL_036	NSCLC metastasis (meningeal carcinomatosis)	M	CSF	Diagnosis	2.8	neg	0	no	NA	NA	NA	NA
Non-CNSL_037	GBM	M	CSF	Diagnosis	0.7	neg	0	no	NA	NA	NA	NA
Non-CNSL_038	GBM	M	CSF	Diagnosis	0.6	neg	0	no	NA	NA	NA	NA
Non-CNSL_039	Desmoplastic Medulloblastoma	F	CSF	Diagnosis	1.2	neg	0	no	NA	NA	NA	NA
Non-CNSL_040	GBM	F	CSF	Diagnosis	0.5	neg	0	no	NA	NA	NA	NA
Non-CNSL_041	Encephalitis	F	CSF	Diagnosis	5.8	neg	0	no	NA	NA	NA	NA
CNSL, central nervous system lymphoms
PCNSL, primary CNSL
iSCNSL, isolated secondary CNSL
ID, identifier
CSF, cerebrospinal fluid
M, male
F, female
mL, milliliters
pos, positive
neg, negative
ddPCR, digital droplet PCR
NGS, next-generation sequencing
NA, not applicable or not assessed
CP, cytology
FC, flow cytometry
GBM, glioblastoma
NSCLC, non-small cell lung cancer
SCLC, small cell lung cancer

## Sheet: Supplementary Table 8
Supplementary Table 8. Overview and characteristics of CSF samples submitted for routine ctDNA testing by the MYD88 L265P ddPCR assay.
Patient ID	Sample ID	Sex (M/F)	Age at lumbar puncture	Submitter (internal/external)	Submitted CSF volume (mL)	Turnover (days)	ddPCR result (pos/neg)	ddPCR allele frequency (%)	Participation in observational study (yes/no)
P001	P001_p1	M	67	external	2.1	5	pos	0.106396	no
P002	P002_p1	F	68	external	6.3	2	pos	0.226313	yes
P003	P003_p1	F	78	internal	0.95	4	pos	0.487313	yes
P003	P003_p2	F	78	internal	2.5	2	pos	0.293494	yes
P004	P004_p1	F	76	external	5.5	5	neg	0	no
P005	P005_p1	M	79	internal	0.8	1	pos	4.62428	yes
P005	P005_p2	M	80	internal	1.9	7	pos	0.225904	yes
P006	P006_p1	M	57	external	2.3	11	neg	0	no
P006	P006_p2	M	51	external	5.65	11	neg	0	yes
P007	P007_p1	F	72	internal	2.7	6	neg	0	yes
P008	P008_p1	M	78	internal	5.6	13	neg	0	yes
P009	P009_p1	F	58	internal	2.1	9	neg	0	yes
P010	P010_p1	M	72	external	4	2	neg	0	yes
P011	P011_p1	M	61	external	2.5	1	neg	0	no
P012	P012_p1	M	81	external	1.7	9	neg	0	no
P013	P013_p1	M	47	internal	1.2	9	neg	0	yes
P014	P014_p1	M	75	internal	0.6	1	neg	0	yes
P015	P015_p1	F	65	internal	2.9	4	neg	0	yes
P016	P016_p1	F	57	internal	1.55	2	pos	0.30811	yes
P017	P017_p1	F	75	external	4.8	1	pos	0.11521	yes
P018	P018_p1	F	73	external	5.1	3	neg	0	yes
P019	P019_p1	M	83	internal	3.8	6	neg	0	yes
P020	P020_p1	F	46	external	2.3	2	neg	0	no
P021	P021_p1	M	66	internal	1.6	6	neg	0	yes
P022	P022_p1	M	57	internal	1.8	0	neg	0	yes
P023	P023_p1	M	25	external	2.5	2	neg	0.00346866	no
P024	P024_p1	M	62	internal	2.5	3	neg	0	yes
P025	P025_p1	M	75	external	3	4	pos	0.58102	no
P026	P026_p1	M	48	internal	2.9	21	neg	0	yes
P027	P027_p1	M	66	internal	1.65	4	pos	10.7981	yes
P028	P028_p1	F	81	external	4	11	pos	0.500442	no
P029	P029_p1	M	60	external	3	1	neg	0	no
P030	P030_p1	F	75	external	5	2	neg	0	yes
P031	P031_p1	M	72	external	4.6	3	neg	0	yes
P032	P032_p1	M	57	internal	3.5	4	neg	0	yes
P033	P033_p1	M	68	external	5.5	5	neg	0	no
P034	P034_p1	F	81	external	1.8	9	pos	0.0818331	yes
P035	P035_p1	F	69	internal	0.5	3	pos	2.25564	yes
P036	P036_p1	F	44	external	5.9	7	neg	0.00365141	no
P037	P037_p1	F	36	external	2.1	5	neg	0	no
P038	P038_p1	M	44	internal	2.4	3	neg	0	yes
P039	P039_p1	M	72	internal	2.5	7	pos	4.62963	yes
P040	P040_p1	F	76	external	5.05	2	neg	0	yes
P041	P041_p1	F	79	external	4.4	0	neg	0	yes
P042	P042_p1	F	77	internal	2	7	neg	0	yes
P043	P043_p1	M	66	external	3.5	2	neg	0	yes
P044	P044_p1	M	67	internal	7.6	4	neg	0	yes
P045	P045_p1	M	52	internal	1.8	6	neg	0	yes
P046	P046_p1	F	78	internal	0.9	8	pos	13.0958	yes
P047	P047_p1	M	78	external	4.5	2	pos	0.198446	yes
P048	P048_p1	M	69	internal	3	7	neg	0	yes
P049	P049_p1	F	60	external	5.55	7	neg	0	yes
P050	P050_p1	M	64	internal	1.35	3	neg	0	yes
P051	P051_p1	F	61	external	4.3	1	neg	0	yes
P051	P051_p2	F	61	external	1.15	2	neg	0	yes
P052	P052_p1	F	76	external	1.5	1	neg	0	yes
P053	P053_p1	M	55	external	5	9	neg	0	yes
P054	P054_p1	F	67	internal	2.75	3	neg	0	yes
P055	P055_p1	M	79	external	6.1	6	neg	0	yes
P056	P056_p1	F	78	internal	1.1	6	neg	0	yes
P057	P057_p1	M	66	external	3	4	neg	0	no
P058	P058_p1	M	76	internal	2.2	6	pos	0.167299	yes
P059	P059_p1	F	43	external	2.5	1	neg	0	no
P060	P060_p1	M	56	external	2	9	neg	0	yes
P061	P061_p1	F	48	external	3	7	neg	0	yes
P062	P062_p1	M	63	internal	3.1	5	neg	0	yes
P063	P063_p1	F	56	internal	1	5	neg	0	yes
P064	P064_p1	M	79	external	4.1	1	pos	0.0792124	no
P065	P065_p1	F	85	external	3.8	1	pos	2.72858	yes
P066	P066_p1	M	80	internal	3.75	1	pos	4.12325	yes
P067	P067_p1	F	74	external	5.7	7	neg	0	yes
P068	P068_p1	F	83	external	5	5	pos	1.45916	yes
P069	P069_p1	F	71	internal	1.8	18	pos	0.552486	yes
P070	P070_p1	F	69	internal	1.7	8	pos	3.01877	yes
P071	P071_p1	F	52	external	5	2	neg	0	no
P072	P072_p1	M	80	external	1.8	7	neg	0	yes
P073	P073_p1	M	73	external	1.4	7	neg	0	no
P074	P074_p1	F	74	external	4.3	2	neg	0	no
P075	P075_p1	F	53	internal	0.9	5	neg	0	yes
P076	P076_p1	M	52	internal	2.3	6	neg	0	yes
P076	P076_p1	M	52	internal	2.4	5	neg	0	yes
P077	P077_p1	M	55	internal	1.4	6	neg	0	no
P078	P078_p1	F	67	external	3	2	neg	0	no
P079	P079_p1	M	55	internal	2.3	1	pos	1.30147	yes
P079	P079_p2	M	55	internal	1.6	10	neg	0	yes
P080	P080_p1	M	74	external	5.7	4	neg	0	yes
P081	P081_p1	M	64	external	3.15	12	pos	0.122699	yes
P082	P082_p1	F	62	external	2.2	1	neg	0	yes
P083	P083_p1	M	55	external	3	5	neg	0	no
P084	P084_p1	M	72	internal	3.6	4	pos	0.216724	yes
P084	P084_p2	M	72	internal	0.8	2	pos	0.392157	yes
P085	P085_p1	M	70	internal	1	2	neg	0	yes
P086	P086_p1	F	83	internal	1	4	neg	0	yes
P087	P087_p1	F	60	internal	1.5	6	neg	0	yes
P088	P088_p1	M	80	external	5.3	7	pos	0.227494	yes
P089	P089_p1	F	38	external	3.8	8	neg	0	no
P090	P090_p1	M	63	internal	1.5	5	neg	0	yes
P091	P091_p1	M	77	internal	6.5	6	neg	0	yes
P092	P092_p1	M	56	external	2.15	3	neg	0	no
P093	P093_p1	M	66	external	6.4	4	pos	7.49953	no
P093	P093_p2	M	66	external	3.5	6	neg	0	no
P094	P094_p1	M	27	external	2.9	5	neg	0	no
P095	P095_p1	F	49	external	2.9	7	neg	0	no
P095	P095_p2	F	49	external	4	3	pos	0.0742482	no
P095	P095_p3	F	49	external	2.8	20	neg	0	no
P096	P096_p1	M	73	internal	1.5	7	neg	0	yes
P097	P097_p1	F	74	external	5.4	7	neg	0	yes
P098	P098_p1	M	69	external	4.1	8	neg	0	yes
P099	P099_p1	F	70	external	3.8	3	neg	0	no
P100	P100_p1	M	53	internal	1.4	6	neg	0	yes
P101	P101_p1	F	72	external	4	5	pos	0.542118	yes
P101	P101_p2	F	72	external	5.82	3	pos	1.9314	yes
P102	P102_p1	M	42	internal	8.9	5	pos	0.291036	yes
P103	P103_p1	F	81	external	1.3	7	pos	0.0554734	yes
P104	P104_p1	M	34	external	3	7	neg	0	no
P104	P104_p1	M	34	external	4.5	2	neg	0	no
P105	P105_p1	F	64	external	3.8	9	pos	0.0741107	no
P106	P106_p1	F	39	external	4.9	2	neg	0	no
P107	P107_p1	M	55	internal	4.4	10	neg	0	yes
P108	P108_p1	M	57	external	10	5	neg	0	no
P108	P108_p2	M	57	external	2.8	24	neg	0	no
P109	P109_p1	M	67	internal	1.5	6	pos	0.48369	yes
P110	P110_p1	F	68	internal	1.1	10	neg	0	yes
P111	P111_p1	M	66	external	2.2	4	neg	0	yes
P112	P112_p1	F	76	external	4.6	2	neg	0	yes
P113	P113_p1	M	75	external	2.7	5	pos	0.765923	no
P114	P114_p1	M	57	external	3.5	1	pos	1.43582	no
P115	P115_p1	F	61	internal	2.4	7	neg	0	yes
P116	P116_p1	F	62	external	3.8	10	neg	0	no
P117	P117_p1	M	28	external	2.8	3	neg	0	no
P118	P118_p1	M	20	external	1.8	2	neg	0	no
P119	P119_p1	F	44	external	4	1	neg	0	yes
P120	P120_p1	M	48	external	2.2	5	pos	3.30189	no
P121	P121_p1	M	69	external	5	2	pos	3.63337	yes
P121	P121_p2	M	69	external	5	5	pos	4.81283	yes
P121	P121_p3	M	69	external	4.6	4	pos	9.89165	yes
P122	P122_p1	F	49	internal	1.4	5	neg	0	no
P123	P123_p1	F	73	external	4	16	pos	0.140502	no
P124	P124_p1	M	63	external	3.6	3	neg	0	yes
P125	P125_p1	F	78	external	1.5	9	pos	0.0548328	yes
P126	P126_p1	F	61	external	3.5	5	neg	0	no
P127	P127_p1	M	66	internal	0.7	2	neg	0	yes
P128	P128_p1	F	88	external	3.3	5	neg	0	yes
P129	P129_p1	M	31	internal	1.5	6	neg	0	yes
P130	P130_p1	M	47	internal	1.6	4	neg	0	yes
P131	P131_p1	F	81	external	3.7	5	neg	0	yes
P132	P132_p1	F	60	internal	0.85	13	neg	0	yes
P133	P133_p1	F	42	internal	5.6	2	neg	0	yes
P134	P134_p1	F	69	external	1.9	6	neg	0	no
P135	P135_p1	M	70	external	3.85	1	pos	6.78792	yes
P136	P136_p1	M	66	internal	1.8	6	neg	0	no
P137	P137_p1	F	72	external	4	15	neg	0	no
P138	P138_p1	F	76	external	1.4	2	pos	2.43472	yes
P139	P139_p1	F	73	external	3	1	pos	0.677913	no
P140	P140_p1	M	65	internal	2	9	pos	0.0565565	yes
P141	P141_p1	F	74	internal	3	7	pos	0.344828	yes
P142	P142_p1	F	82	internal	5.75	20	pos	12.3234	yes
P143	P143_p1	M	41	external	1.83	4	neg	0	yes
P144	P144_p1	M	63	internal	3.8	7	neg	0	yes
P144	P144_p2	M	63	internal	1.6	3	neg	0	yes
P144	P144_p3	M	63	internal	2.05	11	pos	3.12845	yes
P144	P144_p4	M	63	internal	0.9	4	neg	0.00324244	yes
P145	P145_p1	M	84	external	2.85	2	neg	0	no
P146	P146_p1	M	83	internal	2.9	7	neg	0	yes
P147	P147_p1	F	23	external	5.15	7	pos	0.0695894	yes
P148	P148_p1	F	57	external	4.6	8	neg	0	yes
P149	P149_p1	M	75	external	3.72	3	pos	1.05217	no
P150	P150_p1	F	71	external	2	4	neg	0	no
P151	P151_p1	F	67	external	1.6	5	pos	0.0715966	no
P152	P152_p1	F	73	external	2.5	5	pos	15.6205	yes
P153	P153_p1	F	63	external	4.3	3	pos	0.381715	no
P154	P154_p1	M	50	external	3.1	2	neg	0	no
P155	P155_p1	M	59	internal	3.3	6	neg	0	yes
P156	P156_p1	F	83	internal	3.9	0	pos	25.2255	yes
P157	P157_p1	F	62	internal	3.6	16	neg	0	yes
P158	P158_p1	M	63	external	2.4	3	neg	0	yes
P159	P159_p1	F	64	external	3	5	neg	0	yes
P160	P160_p1	F	67	external	5.7	4	neg	0	yes
P161	P161_p1	M	75	internal	3.9	1	neg	0	yes
P162	P162_p1	M	84	internal	3	4	neg	0	yes
P163	P163_p1	M	60	external	2.9	7	neg	0	no
P164	P164_p1	F	80	internal	2.7	6	neg	0	yes
P165	P165_p1	F	80	external	1.5	2	pos	1.88172	yes
P166	P166_p1	M	62	external	1.8	2	pos	1.13304	yes
P167	P167_p1	M	32	external	1.3	19	neg	0.000541457	yes
P168	P168_p1	M	84	external	5.1	10	pos	0.564617	yes
P168	P168_p2	M	85	external	5.1	8	pos	0.555042	yes
P169	P169_p1	F	80	external	3.1	3	pos	1.02249	no
P170	P170_p1	M	84	internal	6	2	neg	0	yes
P171	P171_p1	F	70	internal	2.4	4	neg	0	yes
P172	P172_p1	M	37	external	4.4	7	neg	0	no
P172	P172_p2	M	37	external	4	7	neg	0	no
P173	P173_p1	M	75	external	4.8	2	neg	0	no
P174	P174_p1	F	67	external	2.8	5	pos	0.136565	yes
P175	P175_p1	M	74	external	1.8	3	neg	0	yes
P176	P176_p1	M	74	external	2	1	pos	3.46347	yes
P177	P177_p1	M	75	internal	3.6	15	pos	0.166852	yes
P177	P177_p2	M	76	internal	1.5	5	neg	0	yes
P178	P178_p1	F	56	internal	1.3	2	pos	0.196367	yes
P178	P178_p2	F	57	internal	1.1	7	neg	0	yes
P178	P178_p3	F	57	internal	0.95	5	pos	4.2182	yes
P179	P179_p1	M	76	external	8.4	7	neg	0	yes
P180	P180_p1	F	51	internal	1.8	3	pos	0.122399	yes
P181	P181_p1	F	68	external	3.7	7	neg	0	no
P182	P182_p1	M	49	internal	9.1	1	neg	0	yes
ID, identifier
CSF, cerebrospinal fluid
ddPCR, digital droplet PCR
ctDNA, circulating tumor DNA
M, male
F, female
mL, milliliters
pos, positive
neg, negative

## Sheet: Supplementary Table 9
Supplementary Table 9. Overview and characteristics of CSF samples and patients participating in the observational study.
Patient ID	Sample ID	Reason for submission Category 1/2/3	Reason for submission Sub-category	ddPCR result (pos/neg)	Surgical biopsy of brain lesion (yes/no/NA)	Diagnosis brain lesion	Known systemic lymphoma (yes/no/NA)	Systemic lymphoma entity	Steroids received before CSF analysis (yes/no/Unknown)	Cumulative steroid dose (Dexamethasone equivalent, mg)	Conventional analysis of CSF (yes/no)	CSF cytopathology (yes/no)	Result CSF cytopathology	CSF flow cytometry (yes/no)	Result CSF flow cytometry	Result CSF CP/FC combined	Effect of CSF-ctDNA analysis on surgical intervention, treatment, or clinical management (yes/no)	Effect on surgical intervention	Effect on treatemt	Other effect on clinical management	Used as MRD marker or potential use as MRD marker	Initiated CNS-specific therapy based on CSF-ctDNA analysis	Brain tumor response to initiated therapy (radiological or clinically) (yes/no)	Treatment response of brain lesion (Therapy may not be completed yet)
P002	P002_p1	2	2d	pos	no	NA	no (Previous PCNSL)	NA	no	NA	yes	no	NA	yes	Unclear	Negative	yes	Surgical biopsy obviated	Treatment-guiding	no	yes	R-DeVIC	yes	PR
P003	P003_p1	3	3	pos	yes	DLBCL	no	NA	yes	56	yes	yes	Unclear cell infiltrate	yes	Negative	Negative	no	no	no	no	yes	NA	NA	NA
P003	P003_p2	3	3	pos	no	NA	no	NA	no	NA	yes	yes	Negative	yes	Negative	Negative	no	no	no	no	yes	NA	NA	NA
P005	P005_p1	2	2a	pos	NA	NA	yes	DLBCL	no	NA	yes	yes	Negative	yes	Negative	Negative	no	no	no (not fit for CNS-directed therapy)	no	yes	NA	NA	NA
P005	P005_p2	3	3	pos	no	NA	yes	DLBCL	no	NA	yes	yes	Negative	yes	Negative	Negative	no	no	no	no	yes	NA	NA	NA
P006	P006_p2	1	1a	neg	no	NA	no	NA	no	NA	yes	no	NA	yes	Unclear	Negative	no	no	no	no	no	NA	NA	NA
P007	P007_p1	2	2a	neg	NA	NA	yes	DLBCL	yes	80	yes	yes	Negative	yes	Negative	Negative	no	no	no	no	no	NA	NA	NA
P008	P008_p1	1	1c	neg	yes	No definitive diagnosis / T-cell rich lymphocytic infiltrates	no	NA	yes	6	yes	no	NA	yes	Negative	Negative	no	no	no	no	no	NA	NA	NA
P009	P009_p1	1	1a	neg	no	NA	no	NA	no	NA	yes	no	NA	yes	Negative	Negative	no	no	no	no	no	NA	NA	NA
P010	P010_p1	1	1b	neg	yes	Glioma	no	NA	no	NA	yes	yes	Negative	yes	Negative	Negative	no	no	no	no	no	NA	NA	NA
P013	P013_p1	2	2a	neg	NA	NA	yes	Burkitt lymphoma	no	NA	yes	yes	Negative	yes	Negative	Negative	no	no	no	no	no	NA	NA	NA
P014	P014_p1	2	2a	neg	NA	NA	yes	DLBCL	no	NA	yes	yes	Unclear cell infiltrate	yes	Negative	Negative	no	no	no	no	no	NA	NA	NA
P015	P015_p1	2	2c	neg	no	NA	yes	HGBCL	no	NA	yes	yes	Negative	yes	Positive	Positive	no	no	no (received HD-Cytarabine based on CSF FC result)	no	no	NA	NA	NA
P016	P016_p1	3	3	pos	yes	DLBCL	no	NA	yes	70	yes	yes	Negative	yes	Unclear	Negative	no	no	no	no	yes	NA	NA	NA
P017	P017_p1	1	1a	pos	no	NA	no	NA	yes	800	yes	yes	Negative	yes	Positive	Positive	yes	Surgical biopsy obviated	Treatment-guiding	no	yes	R-MTX + Procarbazine + Zanubrutinib	yes	CR
P018	P018_p1	2	2b	neg	no	NA	yes	DLBCL	Unknown	NA	yes	no	NA	yes	Positive	Positive	no	no	no (received R-MTX based on CSF FC result)	no	no	NA	NA	NA
P019	P019_p1	1	1b	neg	yes	GBM	no	NA	no	NA	yes	no	NA	yes	Negative	Negative	no	no	no	no	no	NA	NA	NA
P021	P021_p1	2	2a	neg	NA	NA	yes	HGBCL	yes	32	yes	no	NA	yes	Negative	Negative	no	no	no	no	no	NA	NA	NA
P022	P022_p1	2	2d	neg	no	NA	no (Previous PCNSL)	NA	yes	12	yes	yes	Negative	yes	Negative	Negative	no	no	no	no	no	NA	NA	NA
P024	P024_p1	2	2a	neg	NA	NA	yes	DLBCL	yes	80	yes	yes	Negative	yes	Negative	Negative	no	no	no	no	no	NA	NA	NA
P026	P026_p1	1	1c	neg	yes	No definitive diagnosis / T-cell rich inflammatory infiltrate	no	NA	no	NA	yes	yes	Negative	yes	Negative	Negative	no	no	no	no	no	NA	NA	NA
P027	P027_p1	3	3	pos	yes	DLBCL	yes	DLBCL	yes	114	yes	yes	Negative	yes	Unclear	Negative	no	no	no	no	yes	NA	NA	NA
P030	P030_p1	1	1a	neg	no	NA	no	NA	no	NA	yes	yes	Negative	yes	Negative	Negative	no	no	no	no	no	NA	NA	NA
P031	P031_p1	2	2d	neg	no	NA	no (Previous PCNSL)	NA	no	NA	yes	yes	Unclear cell infiltrate	yes	Unclear	Negative	no	no	no	no	no	NA	NA	NA
P032	P032_p1	1	1b	neg	yes	Malignant mesenchymal tumor	no	NA	no	NA	yes	yes	Unclear cell infiltrate	yes	Unclear	Negative	no	no	no	no	no	NA	NA	NA
P034	P034_p1	1	1b	pos	yes	DLBCL	no	NA	no	NA	yes	yes	Negative	yes	Negative	Negative	yes	no	no (Therapy started after biopsy)	Accelerated diagnosis	yes	NA	NA	NA
P035	P035_p1	2	2a	pos	NA	NA	yes	HGBCL	yes	88	yes	yes	Negative	yes	Negative	Negative	yes	no	Treatment-guiding	no	yes	R-DHAOx + autoSCT	Not evaluable	No evaluable brain lesion (occult involvement)
P038	P038_p1	2	2a	neg	NA	NA	yes	DLBCL	no	NA	yes	yes	Unclear cell infiltrate	yes	Unclear	Negative	no	no	no	no	no	NA	NA	NA
P039	P039_p1	2	2a	pos	NA	NA	yes	Testicular DLBCL	yes	32	yes	yes	Unclear cell infiltrate	yes	Negative	Negative	yes	no	Treatment-guiding	no	yes	MARTA + R-CHOP + autoSCT	Not evaluable	No evaluable brain lesion (occult involvement)
P040	P040_p1	1	1b	neg	yes	GBM	no	NA	no	NA	yes	yes	Negative	no	NA	Negative	no	no	no	no	no	NA	NA	NA
P041	P041_p1	2	2c	neg	no	NA	yes	Follicular lymphoma	no	NA	yes	yes	Unclear cell infiltrate	yes	Negative	Negative	no	no	no	no	no	NA	NA	NA
P042	P042_p1	2	2a	neg	NA	NA	yes	Transformed follicular lymphoma	no	NA	yes	yes	Negative	yes	Negative	Negative	no	no	no	no	no	NA	NA	NA
P043	P043_p1	1	1a	neg	no	NA	no	NA	Unknown	NA	yes	yes	Negative	yes	Negative	Negative	no	no	no	no	no	NA	NA	NA
P044	P044_p1	1	1a	neg	no	NA	no	NA	no	NA	yes	yes	Negative	yes	Negative	Negative	no	no	no	no	no	NA	NA	NA
P045	P045_p1	1	1a	neg	no	NA	no	NA	no	NA	yes	no	NA	yes	Negative	Negative	no	no	no	no	no	NA	NA	NA
P046	P046_p1	3	3	pos	yes	DLBCL	no	NA	yes	84	yes	no	NA	yes	Unclear	Negative	no	no	no	no	yes	NA	NA	NA
P047	P047_p1	3	3	pos	yes	DLBCL	no	NA	no	NA	yes	no	NA	yes	Unclear	Negative	no	no	no	no	yes	NA	NA	NA
P048	P048_p1	1	1c	neg	yes	No definitive diagnosis	no	NA	yes	84	yes	yes	Negative	yes	Negative	Negative	no	no	no	no	no	NA	NA	NA
P049	P049_p1	2	2a	neg	NA	NA	yes	Marginal zone lymphoma	no	NA	yes	no	NA	yes	Negative	Negative	no	no	no	no	no	NA	NA	NA
P050	P050_p1	2	2a	neg	NA	NA	yes	HGBCL	yes	8	yes	no	NA	yes	Negative	Negative	no	no	no	no	no	NA	NA	NA
P051	P051_p1	2	2a	neg	NA	NA	yes	DLBCL	no	NA	yes	no	NA	yes	Negative	Negative	no	no	no	no	no	NA	NA	NA
P051	P051_p2	2	2c	neg	no	NA	yes	DLBCL	no	NA	yes	no	NA	yes	Negative	Negative	no	no	no	no	no	NA	NA	NA
P052	P052_p1	2	2b	neg	no	NA	yes	DLBCL	no	NA	yes	no	NA	yes	Unclear	Negative	no	no	no	no	no	NA	NA	NA
P053	P053_p1	2	2a	neg	NA	NA	yes	DLBCL	no	NA	yes	no	NA	yes	Negative	Negative	no	no	no	no	no	NA	NA	NA
P054	P054_p1	2	2a	neg	NA	NA	yes	DLBCL	yes	10	yes	yes	Unclear cell infiltrate	yes	Negative	Negative	no	no	no	no	no	NA	NA	NA
P055	P055_p1	2	2c	neg	no	NA	yes	HGBCL	no	NA	yes	no	NA	yes	Unclear	Negative	no	no	no	no	no	NA	NA	NA
P056	P056_p1	3	3	neg	yes	DLBCL	no	NA	yes	48	yes	yes	Unclear cell infiltrate	yes	Negative	Negative	no	no	no	no	yes	NA	NA	NA
P058	P058_p1	3	3	pos	yes	DLBCL	yes	DLBCL	yes	28	yes	no	NA	yes	Negative	Negative	no	no	no	no	yes	NA	NA	NA
P060	P060_p1	3	3	neg	yes	DLBCL	no	NA	no	NA	yes	no	NA	yes	Negative	Negative	no	no	no	no	yes	NA	NA	NA
P061	P061_p1	2	2a	neg	NA	NA	yes	DLBCL	no	NA	yes	no	NA	yes	Unclear	Negative	no	no	no	no	no	NA	NA	NA
P062	P062_p1	1	1c	neg	yes	No definitive diagnosis / Suspicious for encephalitis	no	NA	yes	36	yes	yes	Negative	yes	Negative	Negative	no	no	no	no	no	NA	NA	NA
P063	P063_p1	2	2d	neg	yes	DLBCL	no (Previous PCNSL)	NA	no	NA	yes	yes	Negative	yes	Negative	Negative	no	no	no	no	no	NA	NA	NA
P065	P065_p1	1	1a	pos	no	NA	no	NA	no	NA	yes	yes	Negative	no	NA	Negative	yes	Surgical biopsy obviated	Treatment-guiding	no	yes	Rituximab + Radiotherapy	no	PD
P066	P066_p1	2	2c	pos	no	NA	yes	DLBCL	no	NA	yes	no	NA	yes	Negative	Negative	yes	Surgical biopsy obviated	Treatment-guiding	no	yes	R-Temozolomide	yes	PR
P067	P067_p1	1	1c	neg	yes	No definitive diagnosis	no	NA	no	NA	yes	no	NA	yes	Negative	Negative	no	no	no	no	no	NA	NA	NA
P068	P068_p1	2	2d	pos	no	NA	no (Previous PCNSL)	NA	no	NA	yes	no	NA	yes	Negative	Negative	yes	Surgical biopsy obviated	Treatment-guiding	no	yes	R-DeVIC	yes	CR
P069	P069_p1	2	2a	pos	NA	NA	yes	DLBCL	yes	80	yes	yes	Unclear cell infiltrate	yes	Negative	Negative	yes	no	Treatment-guiding	no	yes	Pola-R-CHP + MARTA + autoSCT	yes, clinically	Alleviating peripheral neuropathy / No evaluable brain lesion (occult involvement)
P070	P070_p1	2	2b	pos	no	NA	yes	Splenic marginal zone lymphoma	yes	96	yes	no	NA	yes	Negative	Negative	yes	Surgical biopsy obviated	Treatment-guiding	no	yes	MARTA + autoSCT	yes	PR
P072	P072_p1	2	2a	neg	NA	NA	yes	DLBCL	no	NA	yes	no	NA	yes	Negative	Negative	no	no	no	no	no	NA	NA	NA
P075	P075_p1	2	2d	neg	no	NA	no (Previous PCNSL)	NA	no	NA	yes	yes	Negative	yes	Negative	Negative	no	no	no	no	no	NA	NA	NA
P076	P076_p1	2	2a	neg	NA	NA	yes	HGBCL	yes	32	yes	yes	Negative	yes	Negative	Negative	no	no	no	no	no	NA	NA	NA
P076	P076_p1	2	2a	neg	NA	NA	yes	HGBCL	no	NA	yes	yes	Unclear cell infiltrate	yes	Negative	Negative	no	no	no	no	no	NA	NA	NA
P079	P079_p1	1	1c	pos	yes	No definitive diagnosis	no	NA	yes	42	yes	yes	Unclear cell infiltrate	yes	Unclear	Negative	yes	no	Treatment-guiding	no	yes	MATRix + autoSCT	yes	CRu
P079	P079_p2	3	3	neg	yes	DLBCL	no	NA	no	NA	yes	no	NA	yes	Negative	Negative	no	no	no	no	yes	NA	NA	NA
P080	P080_p1	2	2c	neg	no	NA	yes	DLBCL	no	NA	yes	no	NA	yes	Negative	Negative	no	no	no	no	no	NA	NA	NA
P081	P081_p1	2	2a	pos	NA	NA	yes	DLBCL	no	NA	yes	yes	Negative	no	NA	Negative	yes	no	Treatment-guiding	no	yes	R-CHOP + R-MTX	Not evaluable	No evaluable brain lesion (occult involvement)
P082	P082_p1	2	2d	neg	no	NA	no (Previous PCNSL)	NA	no	NA	yes	no	NA	yes	Unclear	Negative	no	no	no	no	no	NA	NA	NA
P084	P084_p1	2	2c	pos	no	NA	yes	Intravascular large B-cell lymphoma	no	NA	yes	yes	Negative	yes	Negative	Negative	yes	Surgical biopsy obviated	Treatment-guiding	no	yes	MARTA	yes	CR
P084	P084_p2	3	3	pos	no	NA	yes	Intravascular large B-cell lymphoma	no	NA	yes	yes	Negative	yes	Negative	Negative	no	no	no	no	yes	NA	NA	NA
P085	P085_p1	3	3	neg	yes	DLBCL	no	NA	yes	52	yes	yes	Negative	yes	Negative	Negative	no	no	no	no	yes	NA	NA	NA
P086	P086_p1	2	2a	neg	NA	NA	yes	Mantle cell lymphoma	no	NA	yes	yes	Negative	yes	Negative	Negative	no	no	no	no	no	NA	NA	NA
P087	P087_p1	3	3	neg	yes	DLBCL	no	NA	yes	12	yes	yes	Unclear cell infiltrate	yes	Unclear	Negative	no	no	no	no	yes	NA	NA	NA
P088	P088_p1	1	1c	pos	yes	No definitive diagnosis	no	NA	no	NA	yes	no	NA	yes	Negative	Negative	yes	no	Treatment-guiding	no	yes	R-MTX	yes	CR
P090	P090_p1	1	1b	neg	yes	GBM	no	NA	no	NA	yes	yes	Negative	yes	Unclear	Negative	no	no	no	no	no	NA	NA	NA
P091	P091_p1	1	1a	neg	no	NA	no	NA	Unknown	NA	yes	yes	Negative	no	NA	Negative	No	no	no	no	no	NA	NA	NA
P096	P096_p1	1	1b	neg	yes	GBM	no	NA	no	NA	yes	yes	Negative	no	NA	Negative	no	no	no	no	no	NA	NA	NA
P097	P097_p1	1	1a	neg	no	NA	no	NA	no	NA	yes	yes	Unclear cell infiltrate	yes	Negative	Negative	no	no	no	no	no	NA	NA	NA
P098	P098_p1	1	1c	neg	yes	No definitive diagnosis	no	NA	no	NA	yes	no	NA	yes	Negative	Negative	no	no	no	no	no	NA	NA	NA
P100	P100_p1	2	2a	neg	NA	NA	yes	DLBCL	no	NA	yes	no	NA	yes	Unclear	Negative	no	no	no	no	no	NA	NA	NA
P101	P101_p1	1	1c	pos	yes	No definitive diagnosis	no	NA	no	NA	yes	no	NA	yes	Negative	Negative	yes	no	Treatment-guiding	no	yes	Dexamethasone	yes	PR
P101	P101_p2	3	3	pos	no	NA	no	NA	no	NA	yes	no	NA	yes	Negative	Negative	no	no	no	no	yes	NA	NA	NA
P102	P102_p1	2	2a	pos	NA	NA	yes	HGBCL	yes	72	yes	yes	Negative	yes	Negative	Negative	yes	no	Treatment-guiding	no	yes	R-CHOP + MATRix	Not evaluable	No evaluable brain lesion (occult involvement)
P103	P103_p1	2	2a	pos	NA	NA	yes	DLBCL	no	NA	yes	no	NA	yes	Negative	Negative	no	no	no (not fit for CNS-directed therapy)	no	yes	NA	NA	NA
P107	P107_p1	2	2a	neg	NA	NA	yes	Transformed follicular lymphoma	no	NA	yes	yes	Negative	yes	Negative	Negative	no	no	no	no	no	NA	NA	NA
P109	P109_p1	3	3	pos	yes	Lymphoplasmacytic lymphoma	no	NA	yes	84	yes	yes	Unclear cell infiltrate	yes	Negative	Negative	no	no	no	no	yes	NA	NA	NA
P110	P110_p1	2	2a	neg	NA	NA	yes	HGBCL	yes	32	yes	no	NA	yes	Negative	Negative	no	no	no	no	no	NA	NA	NA
P111	P111_p1	2	2c	neg	no	NA	yes	DLBCL	no	NA	yes	no	NA	yes	Negative	Negative	no	no	no	no	no	NA	NA	NA
P112	P112_p1	2	2b	neg	no	NA	yes	DLBCL	no	NA	yes	no	NA	yes	Negative	Negative	no	no	no	no	no	NA	NA	NA
P115	P115_p1	1	1a	neg	no	NA	no	NA	yes	13	yes	yes	Unclear cell infiltrate	yes	Negative	Negative	no	no	no	no	no	NA	NA	NA
P119	P119_p1	2	2a	neg	NA	NA	yes	DLBCL	Unknown	NA	yes	no	NA	yes	Unclear	Negative	no	no	no	no	no	NA	NA	NA
P121	P121_p1	3	3	pos	yes	Waldenstrom macroglobulinemia - Bing-Neel-Syndrome	yes	Waldenstrom macroglobulinemia	yes	NA	yes	no	NA	yes	Positive	Positive	no	no	no	no	yes	Ibrutinib	yes	PR
P121	P121_p2	3	3	pos	no	NA	yes	Waldenstrom macroglobulinemia	yes	NA	yes	no	NA	yes	Positive	Positive	no	no	no	no	yes	NA	NA	NA
P121	P121_p3	3	3	pos	no	NA	yes	Waldenstrom macroglobulinemia	Unknown	NA	no	NA	NA	NA	NA	NA	no	no	no	no	yes	NA	NA	NA
P124	P124_p1	2	2c	neg	yes	DLBCL	yes	DLBCL	no	NA	yes	no	NA	yes	Negative	Negative	no	no	no	no	no	NA	NA	NA
P125	P125_p1	3	3	pos	yes	DLBCL	no	NA	yes	448	yes	yes	Negative	yes	Negative	Negative	no	no	no	no	yes	NA	NA	NA
P127	P127_p1	2	2a	neg	NA	NA	yes	Follicular lymphoma	Unknown	NA	yes	yes	Negative	yes	Negative	Negative	no	no	no	no	no	NA	NA	NA
P128	P128_p1	1	1a	neg	no	NA	no	NA	no	NA	yes	no	NA	yes	Negative	Negative	no	no	no	no	no	NA	NA	NA
P129	P129_p1	1	1c	neg	yes	No definitive diagnosis / Suspicious for vasculitis	no	NA	yes	180	yes	yes	Negative	yes	Negative	Negative	no	no	no	no	no	NA	NA	NA
P130	P130_p1	2	2a	neg	NA	NA	yes	DLBCL	yes	96	yes	yes	Negative	yes	Negative	Negative	no	no	no	no	no	NA	NA	NA
P131	P131_p1	3	3	neg	yes	DLBCL	no	NA	no	NA	yes	yes	Negative	yes	Negative	Negative	no	no	no	no	yes	NA	NA	NA
P132	P132_p1	2	2a	neg	NA	NA	yes	DLBCL	yes	80	yes	yes	Unclear cell infiltrate	yes	Unclear	Negative	no	no	no	no	no	NA	NA	NA
P133	P133_p1	1	1c	neg	yes	No definitive diagnosis / Suspicious for neuroepithelial lesion	no	NA	no	NA	yes	yes	Negative	yes	Negative	Negative	no	no	no	no	no	NA	NA	NA
P135	P135_p1	1	1c	pos	yes	No definitive diagnosis	no	NA	no	NA	yes	no	NA	yes	Negative	Negative	yes	no	Treatment-guiding	no	yes	MARTA + autoSCT	yes	PR
P138	P138_p1	2	2c	pos	no	NA	yes	DLBCL	no	NA	yes	no	NA	yes	Negative	Negative	yes	Surgical biopsy obviated	Treatment-guiding	no	yes	Radiatiotherapy	yes	PR
P140	P140_p1	2	2c	pos	yes	No definitive diagnosis	yes	Transformed follicular lymphoma	no	NA	yes	yes	Negative	yes	Negative	Negative	yes	no	no (decision for watch & wait)	Accelerated diagnosis	yes	NA	NA	NA
P141	P141_p1	1	1c	pos	yes	No definitive diagnosis / Suspected cerebral amyloidoma on the basis of Waldenstrom macroglobulinemia	no	NA	no	NA	yes	yes	Unclear cell infiltrate	yes	Negative	Negative	yes	no	no	Supported suspected diagnosis	yes	Watch & Wait	NA	NA
P142	P142_p1	1	1b	pos	yes	DLBCL	no	NA	no	NA	yes	yes	Negative	yes	Negative	Negative	yes	no	no (Therapy started after biopsy)	Accelerated diagnosis	yes	NA	NA	NA
P143	P143_p1	2	2a	neg	NA	NA	yes	Follicular lymphoma	no	NA	yes	no	NA	yes	Negative	Negative	no	no	no	no	no	NA	NA	NA
P144	P144_p1	3	3	neg	no	NA	yes	DLBCL	no	NA	yes	yes	Unclear cell infiltrate	yes	Negative	Negative	no	no	no	no	yes	NA	NA	NA
P144	P144_p2	3	3	neg	no	NA	yes	DLBCL	yes	48	yes	yes	Unclear cell infiltrate	yes	Unclear	Negative	no	no	no	no	yes	NA	NA	NA
P144	P144_p3	3	3	pos	no	NA	yes	DLBCL	no	NA	yes	no	NA	yes	Negative	Negative	no	no	no	no	yes	NA	NA	NA
P144	P144_p4	3	3	neg	no	NA	yes	DLBCL	no	NA	yes	yes	Unclear cell infiltrate	yes	Negative	Negative	no	no	no	no	yes	NA	NA	NA
P146	P146_p1	1	1c	neg	yes	No definitive diagnosis / T-cell rich infiltrates	no	NA	yes	10	yes	yes	Negative	yes	Negative	Negative	no	no	no	no	no	NA	NA	NA
P147	P147_p1	1	1a	pos	no	NA	no	NA	no	NA	yes	yes	Unclear cell infiltrate	yes	Negative	Negative	yes	Surgical biopsy obviated	Unknown due to LFU	no	yes	Unknown due to LFU	Not evaluable	NA
P148	P148_p1	2	2a	neg	NA	NA	yes	DLBCL	no	NA	yes	no	NA	yes	Unclear	Negative	no	no	no	no	no	NA	NA	NA
P152	P152_p1	1	1a	pos	no	NA	no	NA	no	NA	yes	yes	Negative	yes	Negative	Negative	yes	Surgical biopsy obviated	Unknown due to LFU	no	yes	Unknown due to LFU	Not evaluable	NA
P155	P155_p1	1	1a	neg	no	NA	no	NA	no	NA	yes	yes	Negative	yes	Negative	Negative	no	no	no	no	no	NA	NA	NA
P156	P156_p1	1	1a	pos	no	NA	no	NA	no	NA	yes	yes	Unclear cell infiltrate	yes	Negative	Negative	yes	Surgical biopsy obviated	Treatment-guiding	no	yes	R-Temozolomide	yes, clinically	Clinical response (radiologically LFU)
P157	P157_p1	1	1a	neg	no	NA	no	NA	Unknown	NA	yes	yes	Negative	no	NA	Negative	No	no	no	no	no	NA	NA	NA
P158	P158_p1	2	2c	neg	no	NA	yes	DLBCL	no	NA	yes	no	NA	yes	Negative	Negative	no	no	no	no	no	NA	NA	NA
P159	P159_p1	1	1c	neg	yes	No definitive diagnosis / Suspicious for inflammatory disease	no	NA	no	NA	yes	yes	Negative	no	NA	Negative	No	no	no	no	no	NA	NA	NA
P160	P160_p1	2	2c	neg	no	NA	yes	DLBCL	no	NA	yes	no	NA	yes	Unclear	Negative	no	no	no	no	no	NA	NA	NA
P161	P161_p1	1	1a	neg	no	NA	no	NA	yes	1000	yes	yes	Negative	no	NA	Negative	No	no	no	no	no	NA	NA	NA
P162	P162_p1	2	2b	neg	no	NA	yes	Marginal zone lymphoma	no	NA	yes	yes	Unclear cell infiltrate	yes	Positive	Positive	no	no	no (received R-DHA + Zanubrutinib based on CSF FC result)	no	no	NA	NA	NA
P164	P164_p1	2	2a	neg	NA	NA	yes	DLBCL	no	NA	yes	no	NA	yes	Negative	Negative	no	no	no	no	no	NA	NA	NA
P165	P165_p1	2	2d	pos	no	NA	no (Previous PCNSL)	NA	no	NA	yes	no	NA	yes	Unclear	Negative	yes	Surgical biopsy obviated	Treatment-guiding	no	yes	R-MTX	yes	PR
P166	P166_p1	1	1a	pos	no	NA	no	NA	no	NA	yes	yes	Unclear cell infiltrate	yes	Unclear	Negative	yes	Surgical biopsy obviated	Treatment-guiding	no	yes	MATRix + autoSCT	yes	CR
P167	P167_p1	1	1a	neg	no	NA	no	NA	no	NA	yes	yes	Negative	yes	Negative	Negative	no	no	no	no	no	NA	NA	NA
P168	P168_p1	1	1c	pos	yes	No definitive diagnosis / Suspicious for intraocular lymphoma	no	NA	no	NA	yes	no	NA	yes	Unclear	Negative	yes	no	Treatment-guiding	no	yes	Intraocular MTX	yes	PR
P168	P168_p2	3	3	pos	no	NA	no	NA	no	NA	yes	no	NA	yes	Unclear	Negative	no	no	no	no	yes	NA	NA	NA
P170	P170_p1	1	1a	neg	no	NA	no	NA	no	NA	yes	yes	Negative	yes	Negative	Negative	no	no	no	no	no	NA	NA	NA
P171	P171_p1	2	2c	neg	no	NA	yes	DLBCL	yes	18	yes	yes	Unclear cell infiltrate	yes	Negative	Negative	no	no	no	no	no	NA	NA	NA
P174	P174_p1	1	1a	pos	no	NA	no	NA	no	NA	yes	yes	Negative	yes	Negative	Negative	yes	Surgical biopsy obviated	Treatment-guiding	no	yes	MATRix + autoSCT	yes	CRu
P175	P175_p1	1	1a	neg	no	NA	no	NA	no	NA	yes	no	NA	yes	Negative	Negative	no	no	no	no	no	NA	NA	NA
P176	P176_p1	3	3	pos	yes	DLBCL	no	NA	no	NA	yes	no	NA	yes	Unclear	Negative	no	no	no	no	yes	NA	NA	NA
P177	P177_p1	2	2b	pos	no	NA	yes	DLBCL	yes	10	yes	yes	Unclear cell infiltrate	no	NA	Negative	yes	Surgical biopsy obviated	Treatment-guiding	no	yes	MARTA + R-CHOP + autoSCT	yes	CR
P177	P177_p2	3	3	neg	no	NA	yes	DLBCL	no	NA	yes	yes	Negative	yes	Negative	Negative	no	no	no	no	yes	NA	NA	NA
P178	P178_p1	2	2c	pos	no	NA	yes	DLBCL	no	NA	yes	yes	Negative	yes	Negative	Negative	yes	Surgical biopsy obviated	Treatment-guiding	no	yes	MATRix + autoSCT	yes	CR
P178	P178_p2	3	3	neg	no	NA	yes	DLBCL	no	NA	yes	yes	Negative	yes	Negative	Negative	no	no	no	no	yes	NA	NA	NA
P178	P178_p3	3	3	pos	no	NA	yes	DLBCL	no	NA	yes	yes	Unclear cell infiltrate	yes	Unclear	Negative	no	no	no	no	yes	NA	NA	NA
P179	P179_p1	1	1a	neg	no	NA	no	NA	no	NA	yes	yes	Unclear cell infiltrate	yes	Unclear	Negative	no	no	no	no	no	NA	NA	NA
P180	P180_p1	2	2a	pos	NA	NA	yes	HGBCL	yes	64	yes	yes	Negative	yes	Negative	Negative	yes	no	Treatment-guiding	no	yes	R-CHOP + MATRix + autoSCT	Not evaluable	No evaluable brain lesion (occult involvement)
P182	P182_p1	1	1a	neg	no	NA	no	NA	yes	50	yes	no	NA	yes	Unclear	Negative	no	no	no	no	no	NA	NA	NA
CSF, cerebrospinal fluid
ID, identifier
ddPCR, digital droplet PCR
pos, positive
neg, negative
NA, not applicable or not assessed
DLBCL, diffuse large B-cell lymphoma
GBM, glioblastoma
HGBCL, high-grade B-cell lymphoma
mg, milligram
CP, cytopathology
FC, flow cytometry
ctDNA, circulating tumor DNA
LFU, loss of follow-up
R-DeVIC: Rituximab, Dexamethasone, Etoposide, Ifosfamide, Carboplatin
MARTA: High-dose Methotrexate, High-dose Cytarabine, Rituximab
MATRix: High-dose Methotrexate, High-dose Cytarabine, Rituximab, Thiotepa
R-MTX: Rituximab, High-dose methotrexate
R-DHAOx: Rituximab, Dexamethasone, Cytarabine, Oxaliplatin
R-CHOP: Rituximab, Cyclophosphamide, Doxorubicin, Vincristine, Prednisone
autoSCT: autologous stem cell transplantation
R: Rituximab
Pola-R-CHP: Polatuzumab Vedotin, Rituximab, Cyclophosphamide, Doxorubicin, Prednisone
CR, complete response
CRu, complete response unconfirmed
PR, partial response
PD, progressive disease
